# Supplementary material
Source: publisher figshare collection journal article supplement (https://gsajournals.figshare.com/articles/dataset/_/11919495)
Supplement: Supplementary file 1 [file 1]

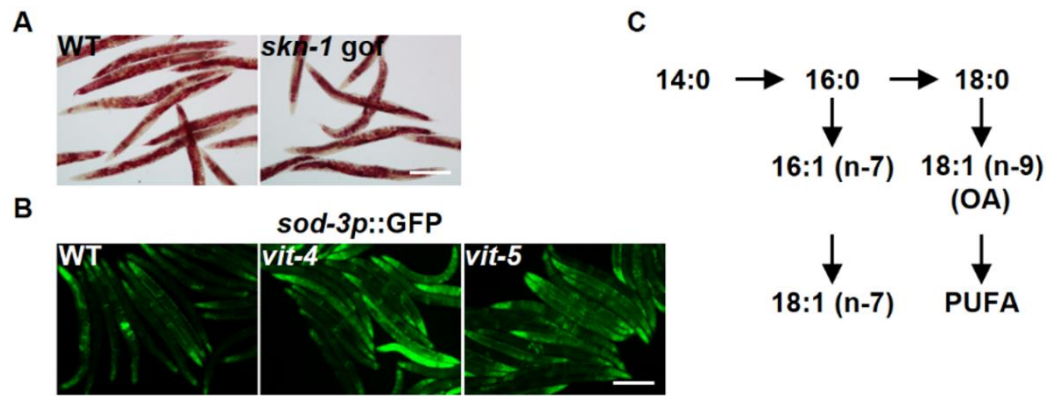

**Fig S4. Lipid metabolism links SKN-1 and DAF-16.** (A) Effects of the *skn-1 gof* mutation on fat accumulation as measured by Oil red O staining. (B) Effects of *vit-4* and *vit-5* mutations on *sod-3p::GFP* expression under heat stress. (C) The schematic of unsaturated fatty acid synthetic pathway in *C. elegans*. Scale bar = 100 $\mu$ m.
