# Supplementary material
Source: publisher figshare collection journal article supplement (https://gsajournals.figshare.com/articles/dataset/_/11919495)
Supplement: Supplementary file 2 [file 1]

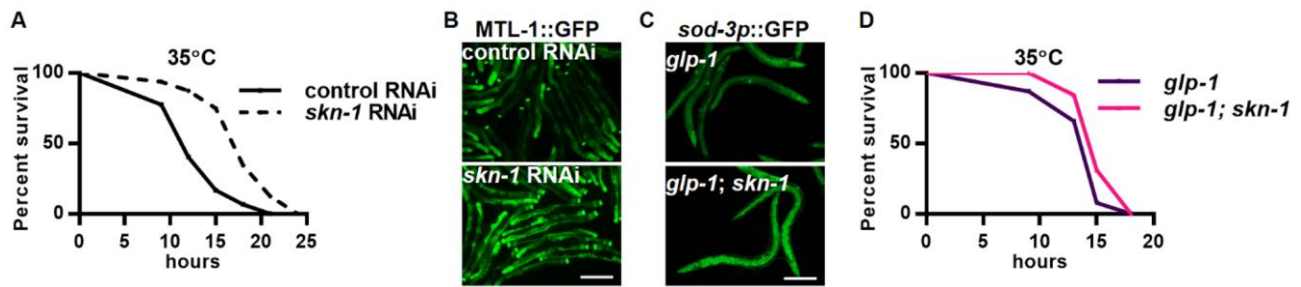

**Fig S3. Inhibition of SKN-1 activates DAF-16.** (A) Effects of *skn-1* RNAi on heat stress resistance.

(B) Effects of *skn-1* RNAi on the MTL-1::GFP expression. (C-D) Effects of *skn-1* loss-of-function mutation on the expression of *sod-3p::GFP* (C) and survival (D) of *glp-1* mutants under heat stress.

Scale bar = 100μm.
