# Supplementary material
Source: publisher figshare collection journal article supplement (https://gsajournals.figshare.com/articles/dataset/_/11919495)
Supplement: Supplementary file 3 [file 1]

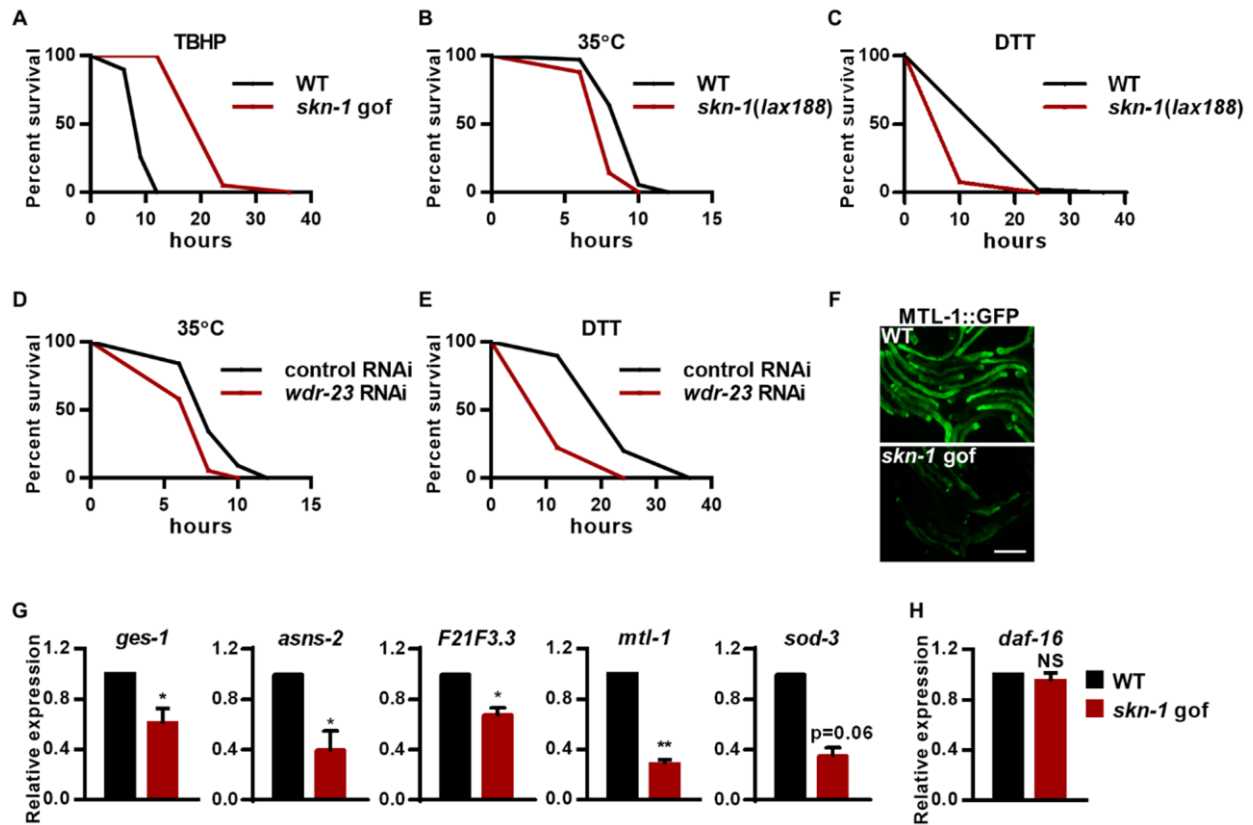

**Fig S1. SKN-1 activation suppresses DAF-16 target genes.** (A) Effects of the *skn-1* *gof* mutation on animal resistance to tert-Butyl hydroperoxide (TBHP) induced oxidative stress. (B-C) Effects of an independent *skn-1* *gof* allele *skn-1(lax188)* on animal resistance to heat stress (B) and DTT (C). (D-E) Effects of *wdr-23* RNAi on animal resistance to heat stress (D) and DTT (E). (F) Effects of the *skn-1* *gof* mutation on MTL-1::GFP expression under heat stress. (G-H) The mRNA levels of DAF-16 target genes (G) and *daf-16* (H) in the *skn-1* *gof* mutants. \*\*  $P < 0.01$ . Scale bar = 100 $\mu$ m.
