# Supplementary material
Source: publisher figshare collection journal article supplement (https://gsajournals.figshare.com/articles/dataset/_/11919495)
Supplement: Supplementary file 4 [file 1]

**Table S1. All survival data. Repeats 1 are graphed in indicated figures.**

| <b>Figures</b>  | <b>Strain/Treatment</b>         | <b>Mean survival time<br/>± SEM (hours)</b> | <b># Worms<br/>Censored/Total</b> | <b>P value</b>                            |
|-----------------|---------------------------------|---------------------------------------------|-----------------------------------|-------------------------------------------|
| <b>Fig 1A</b>   | WT                              | 9.60 ± 0.30                                 | 1/40                              |                                           |
| <b>repeat 1</b> | <i>skn-1</i> gof                | 8.05 ± 0.15                                 | 0/40                              | <0.001 <sup>a</sup>                       |
| <b>Fig 1A</b>   | WT                              | 8.42 ± 0.24                                 | 1/40                              |                                           |
| <b>repeat 2</b> | <i>skn-1</i> gof                | 7.27 ± 0.20                                 | 2/40                              | <0.001 <sup>a</sup>                       |
| <b>Fig 1A</b>   | WT                              | 10.71 ± 0.32                                | 6/45                              |                                           |
| <b>repeat 3</b> | <i>skn-1</i> gof                | 9.26 ± 0.29                                 | 0/46                              | 0.002 <sup>a</sup>                        |
| <b>Fig 1B</b>   | WT                              | 24.50 ± 2.39                                | 2/41                              |                                           |
| <b>repeat 1</b> | <i>skn-1</i> gof                | 15.09 ± 1.16                                | 1/40                              | <0.001 <sup>a</sup>                       |
| <b>Fig 1B</b>   | WT                              | 23.47 ± 1.18                                | 1/40                              |                                           |
| <b>repeat 2</b> | <i>skn-1</i> gof                | 15.00 ± 0.82                                | 0/40                              | <0.001 <sup>a</sup>                       |
| <b>Fig 1B</b>   | WT                              | 22.50 ± 1.14                                | 0/40                              |                                           |
| <b>repeat 3</b> | <i>skn-1</i> gof                | 13.20 ± 0.57                                | 0/40                              | <0.001 <sup>a</sup>                       |
| <b>Fig 1C</b>   | WT                              | 19.80 ± 1.73                                | 0/40                              |                                           |
| <b>repeat 1</b> | <i>skn-1</i> gof                | 12.30 ± 0.30                                | 0/40                              | <0.001 <sup>a</sup>                       |
| <b>Fig 1C</b>   | WT                              | 34.84 ± 3.25                                | 1/37                              |                                           |
| <b>repeat 2</b> | <i>skn-1</i> gof                | 18.56 ± 2.39                                | 0/39                              | <0.001 <sup>a</sup>                       |
| <b>Fig 1C</b>   | WT                              | 33.26 ± 2.43                                | 0/35                              |                                           |
| <b>repeat 3</b> | <i>skn-1</i> gof                | 15.64 ± 1.58                                | 1/33                              | <0.001 <sup>a</sup>                       |
| <b>Fig 1G</b>   | WT                              | 13.54 ± 0.30                                | 0/35                              |                                           |
| <b>repeat 1</b> | <i>skn-1</i> gof                | 11.51 ± 0.31                                | 2/34                              | <0.001 <sup>a</sup>                       |
|                 | <i>daf-16</i>                   | 11.20 ± 0.31                                | 3/35                              | <0.001 <sup>a</sup>                       |
|                 | <i>skn-1</i> gof; <i>daf-16</i> | 11.18 ± 0.22                                | 0/34                              | <0.001 <sup>a</sup><br>0.671 <sup>b</sup> |
| <b>Fig 1G</b>   | WT                              | 13.58 ± 0.28                                | 2/35                              |                                           |
| <b>repeat 2</b> | <i>skn-1</i> gof                | 11.31 ± 0.25                                | 0/35                              | <0.001 <sup>a</sup>                       |
|                 | <i>daf-16</i>                   | 11.6 ± 0.35                                 | 0/35                              | <0.001 <sup>a</sup>                       |
|                 | <i>skn-1</i> gof; <i>daf-16</i> | 10.91 ± 0.27                                | 2/35                              | <0.001 <sup>a</sup><br>0.721 <sup>c</sup> |
| <b>Fig 1G</b>   | WT                              | 12.91 ± 0.26                                | 0/35                              |                                           |
| <b>repeat 3</b> | <i>skn-1</i> gof                | 10.42 ± 0.33                                | 1/35                              | <0.001 <sup>a</sup>                       |
|                 | <i>daf-16</i>                   | 10.86 ± 0.33                                | 0/35                              | <0.001 <sup>a</sup>                       |
|                 | <i>skn-1</i> gof; <i>daf-16</i> | 10.3 ± 0.31                                 | 1/35                              | <0.001 <sup>a</sup><br>0.704 <sup>c</sup> |

|                 |                                   |              |      |                                           |
|-----------------|-----------------------------------|--------------|------|-------------------------------------------|
| <b>Fig 2A</b>   | WT                                | 7.40 ± 0.18  | 1/40 |                                           |
| <b>repeat 1</b> | <i>skn-1</i>                      | 12.34 ± 0.32 | 0/41 | <0.001 <sup>a</sup>                       |
| <b>Fig 2A</b>   | WT                                | 10.93 ± 0.28 | 0/41 |                                           |
| <b>repeat 2</b> | <i>skn-1</i>                      | 12.34 ± 0.32 | 0/41 | <0.001 <sup>a</sup>                       |
| <b>Fig 2A</b>   | WT                                | 9.95 ± 0.32  | 0/41 |                                           |
| <b>repeat 3</b> | <i>skn-1</i>                      | 12.10 ± 0.31 | 2/41 | <0.001 <sup>a</sup>                       |
| <b>Fig 2B</b>   | WT                                | 10.93 ± 0.28 | 0/41 |                                           |
| <b>repeat 1</b> | <i>skn-1</i>                      | 12.34 ± 0.32 | 0/41 | <0.001 <sup>a</sup>                       |
|                 | <i>daf-16</i>                     | 9.02 ± 0.18  | 0/43 | <0.001 <sup>a</sup>                       |
|                 | <i>skn-1; daf-16</i>              | 8.80 ± 0.31  | 1/41 | 0.958 <sup>b</sup>                        |
| <b>Fig 2B</b>   | WT                                | 10.00 ± 0.27 | 0/41 |                                           |
| <b>repeat 2</b> | <i>skn-1</i>                      | 11.14 ± 0.31 | 0/42 | 0.004 <sup>a</sup>                        |
|                 | <i>daf-16</i>                     | 9.41 ± 0.20  | 0/41 | 0.050 <sup>a</sup>                        |
|                 | <i>skn-1; daf-16</i>              | 8.88 ± 0.32  | 0/41 | 0.530 <sup>b</sup>                        |
| <b>Fig 2B</b>   | WT                                | 9.95 ± 0.32  | 0/41 |                                           |
| <b>repeat 3</b> | <i>skn-1</i>                      | 12.10 ± 0.31 | 2/41 | <0.001 <sup>a</sup>                       |
|                 | <i>daf-16</i>                     | 9.00 ± 0.20  | 1/41 | 0.006 <sup>a</sup>                        |
|                 | <i>skn-1; daf-16</i>              | 9.40 ± 0.29  | 6/41 | 0.169 <sup>b</sup>                        |
| <b>Fig 2E</b>   | <i>daf-2</i> control RNAi         | 21.47 ± 0.52 | 2/33 |                                           |
| <b>repeat 1</b> | <i>daf-2 skn-1</i> RNAi           | 23.94 ± 0.60 | 0/33 | <0.001 <sup>a</sup>                       |
| <b>Fig 2E</b>   | <i>daf-2</i> control RNAi         | 19.67 ± 0.65 | 0/33 |                                           |
| <b>repeat 2</b> | <i>daf-2 skn-1</i> RNAi           | 22.23 ± 0.64 | 3/33 | 0.006 <sup>a</sup>                        |
| <b>Fig 2E</b>   | <i>daf-2</i> control RNAi         | 18.76 ± 0.57 | 0/34 |                                           |
| <b>repeat 3</b> | <i>daf-2 skn-1</i> RNAi           | 21.29 ± 0.71 | 2/34 | 0.004 <sup>a</sup>                        |
| <b>Fig 3C</b>   | WT                                | 13.92 ± 0.39 | 0/36 |                                           |
| <b>repeat 1</b> | <i>skn-1</i> gof                  | 10.92 ± 0.36 | 1/37 | <0.001 <sup>a</sup>                       |
|                 | <i>vit-2</i> OE                   | 9.86 ± 0.26  | 1/36 | <0.001 <sup>a</sup>                       |
|                 | <i>skn-1</i> gof; <i>vit-2</i> OE | 10.63 ± 0.25 | 1/36 | <0.001 <sup>a</sup><br>0.445 <sup>c</sup> |
| <b>Fig 3C</b>   | WT                                | 17.75 ± 0.74 | 0/36 |                                           |
| <b>repeat 2</b> | <i>skn-1</i> gof                  | 13.48 ± 0.65 | 1/36 | <0.001 <sup>a</sup>                       |
|                 | <i>vit-2</i> OE                   | 14.83 ± 0.51 | 0/36 | <0.001 <sup>a</sup>                       |
|                 | <i>skn-1</i> gof; <i>vit-2</i> OE | 13.63 ± 0.47 | 1/36 | <0.001 <sup>a</sup><br>0.555 <sup>c</sup> |
| <b>Fig 3C</b>   | WT                                | 12.89 ± 0.39 | 0/36 |                                           |

|                 |                                   |              |       |                                           |
|-----------------|-----------------------------------|--------------|-------|-------------------------------------------|
| <b>repeat 3</b> | <i>skn-1</i> gof                  | 10.66 ± 0.36 | 2/36  | <0.001 <sup>a</sup>                       |
|                 | <i>vit-2</i> OE                   | 10.03 ± 0.34 | 0/39  | <0.001 <sup>a</sup>                       |
|                 | <i>skn-1</i> gof; <i>vit-2</i> OE | 10.06 ± 0.35 | 1/36  | <0.001 <sup>a</sup><br>0.784 <sup>e</sup> |
| <b>Fig 3E</b>   | WT                                | 12.60 ± 0.55 | 0/35  |                                           |
| <b>repeat 1</b> | <i>skn-1</i> gof                  | 11.22 ± 0.45 | 3/35  | 0.039 <sup>a</sup>                        |
|                 | <i>vit-2</i>                      | 13.76 ± 0.53 | 2/36  | 0.169 <sup>a</sup>                        |
|                 | <i>skn-1</i> gof; <i>vit-2</i>    | 13.46 ± 0.57 | 0/37  | 0.215 <sup>a</sup>                        |
| <b>Fig 3E</b>   | WT                                | 13.26 ± 0.54 | 0/38  |                                           |
| <b>repeat 2</b> | <i>skn-1</i> gof                  | 11.68 ± 0.44 | 3/38  | 0.013 <sup>a</sup>                        |
|                 | <i>vit-2</i>                      | 12.78 ± 0.52 | 2/38  | 0.431 <sup>a</sup>                        |
|                 | <i>skn-1</i> gof; <i>vit-2</i>    | 13.34 ± 0.55 | 6/38  | 0.234 <sup>a</sup>                        |
| <b>Fig 3E</b>   | WT                                | 12.08 ± 0.49 | 0/36  |                                           |
| <b>repeat 3</b> | <i>skn-1</i> gof                  | 9.93 ± 0.55  | 2/36  | 0.026 <sup>a</sup>                        |
|                 | <i>vit-2</i>                      | 11.03 ± 0.58 | 1/36  | 0.294 <sup>a</sup>                        |
|                 | <i>skn-1</i> gof; <i>vit-2</i>    | 11.67 ± 0.59 | 1/36  | 0.822 <sup>a</sup>                        |
| <b>Fig S1A</b>  | WT                                | 9.47 ± 0.32  | 15/40 |                                           |
| <b>repeat 1</b> | <i>skn-1</i> gof                  | 24.60 ± 0.41 | 0/40  | <0.001 <sup>a</sup>                       |
| <b>Fig S1A</b>  | WT                                | 8.67 ± 0.50  | 0/36  |                                           |
| <b>repeat 2</b> | <i>skn-1</i> gof                  | 29.67 ± 1.2  | 0/36  | <0.001 <sup>a</sup>                       |
| <b>Fig S1A</b>  | WT                                | 9.32 ± 0.48  | 0/38  |                                           |
| <b>repeat 3</b> | <i>skn-1</i> gof                  | 24.65 ± 1.52 | 0/37  | <0.001 <sup>a</sup>                       |
| <b>Fig S1B</b>  | WT                                | 9.34 ± 0.21  | 3/39  |                                           |
| <b>repeat 1</b> | <i>skn-1(lax188)</i>              | 8.21 ± 0.14  | 0/39  | <0.001 <sup>a</sup>                       |
| <b>Fig S1B</b>  | WT                                | 8.60 ± 0.20  | 0/40  |                                           |
| <b>repeat 2</b> | <i>skn-1(lax188)</i>              | 7.35 ± 0.16  | 1/40  | <0.001 <sup>a</sup>                       |
| <b>Fig S1B</b>  | WT                                | 9.50 ± 0.23  | 0/40  |                                           |
| <b>repeat 3</b> | <i>skn-1(lax188)</i>              | 8.58 ± 0.20  | 0/38  | 0.002 <sup>a</sup>                        |
| <b>Fig S1C</b>  | WT                                | 18.70 ± 1.16 | 0/40  |                                           |
| <b>repeat 1</b> | <i>skn-1(lax188)</i>              | 11.05 ± 0.58 | 0/40  | <0.001 <sup>a</sup>                       |
| <b>Fig S1C</b>  | WT                                | 16.09 ± 1.15 | 3/42  |                                           |
| <b>repeat 2</b> | <i>skn-1(lax188)</i>              | 12.29 ± 0.28 | 1/42  | 0.001 <sup>a</sup>                        |
| <b>Fig S1C</b>  | WT                                | 15.41 ± 1.05 | 0/41  |                                           |
| <b>repeat 3</b> | <i>skn-1(lax188)</i>              | 11.65 ± 0.45 | 1/40  | 0.002 <sup>a</sup>                        |
| <b>Fig S1D</b>  | WT control RNAi                   | 8.56 ± 0.30  | 0/32  |                                           |

|                 |                       |              |      |                     |
|-----------------|-----------------------|--------------|------|---------------------|
| <b>repeat 1</b> | WT <i>wdr-23</i> RNAi | 7.28 ± 0.19  | 0/36 | <0.001 <sup>a</sup> |
| <b>Fig S1D</b>  | WT control RNAi       | 7.92 ± 0.34  | 0/36 |                     |
| <b>repeat 2</b> | WT <i>wdr-23</i> RNAi | 6.27 ± 0.19  | 2/36 | <0.001 <sup>a</sup> |
| <b>Fig S1D</b>  | WT control RNAi       | 8.06 ± 0.38  | 0/35 |                     |
| <b>repeat 3</b> | WT <i>wdr-23</i> RNAi | 7.24 ± 0.28  | 0/34 | 0.035 <sup>a</sup>  |
| <b>Fig S1E</b>  | WT control RNAi       | 25.20 ± 1.02 | 0/40 |                     |
| <b>repeat 1</b> | WT <i>wdr-23</i> RNAi | 14.70 ± 0.79 | 0/40 | <0.001 <sup>a</sup> |
| <b>Fig S1E</b>  | WT control RNAi       | 13.00 ± 0.99 | 4/40 |                     |
| <b>repeat 2</b> | WT <i>wdr-23</i> RNAi | 9.20 ± 0.29  | 0/40 | <0.001 <sup>a</sup> |
| <b>Fig S1E</b>  | WT control RNAi       | 25.23 ± 0.95 | 0/39 |                     |
| <b>repeat 3</b> | WT <i>wdr-23</i> RNAi | 15.00 ± 0.82 | 0/40 | <0.001 <sup>a</sup> |
| <b>Fig S3A</b>  | WT control RNAi       | 13.24 ± 0.62 | 1/31 |                     |
| <b>repeat 1</b> | WT <i>skn-1</i> RNAi  | 18.09 ± 0.68 | 0/32 | <0.001 <sup>a</sup> |
| <b>Fig S3A</b>  | WT control RNAi       | 9.00 ± 0.26  | 0/40 |                     |
| <b>repeat 2</b> | WT <i>skn-1</i> RNAi  | 15.53 ± 0.55 | 0/40 | <0.001 <sup>a</sup> |
| <b>Fig S3A</b>  | WT control RNAi       | 8.98 ± 0.20  | 0/41 |                     |
| <b>repeat 3</b> | WT <i>skn-1</i> RNAi  | 15.29 ± 0.31 | 2/41 | <0.001 <sup>a</sup> |
| <b>Fig S3D</b>  | <i>glp-1</i>          | 14.03 ± 0.37 | 0/38 |                     |
| <b>repeat 1</b> | <i>glp-1; skn-1</i>   | 15.63 ± 0.31 | 4/36 | 0.005 <sup>d</sup>  |
| <b>Fig S3D</b>  | <i>glp-1</i>          | 15.33 ± 0.48 | 0/36 |                     |
| <b>repeat 2</b> | <i>glp-1; skn-1</i>   | 16.57 ± 0.61 | 3/36 | 0.039 <sup>d</sup>  |
| <b>Fig S3D</b>  | <i>glp-1</i>          | 16.7 ± 0.57  | 4/38 |                     |
| <b>repeat 3</b> | <i>glp-1; skn-1</i>   | 18.3 ± 0.47  | 1/39 | 0.04 <sup>d</sup>   |

<sup>a</sup> vs WT/control RNAi

<sup>b</sup> vs *daf-16*

<sup>c</sup> vs *skn-1* *gof*

<sup>d</sup> vs *glp-1*

<sup>e</sup> vs *vit-2* OE
