# Supplementary material
Source: publisher figshare collection journal article supplement (https://gsajournals.figshare.com/articles/dataset/_/11919495)
Supplement: Supplementary file 5 [file 1]

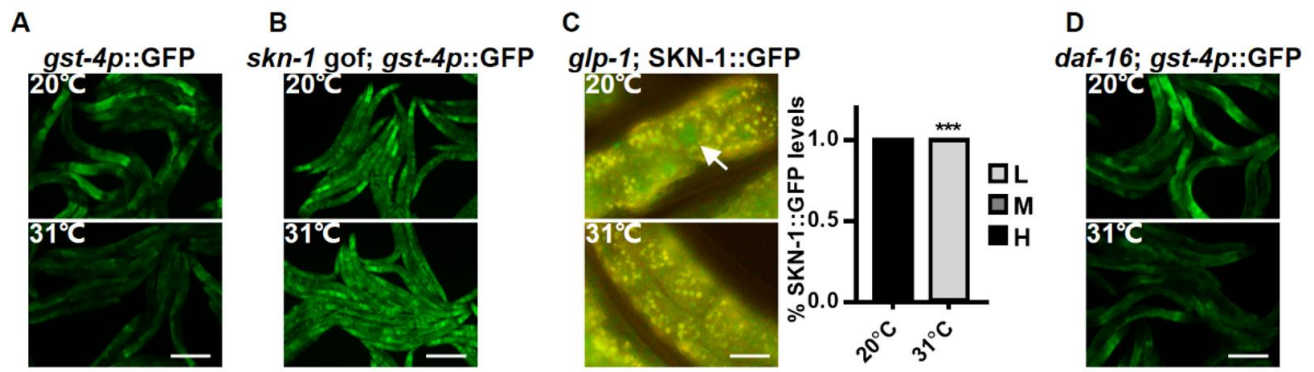

**Fig S2. Heat exposure suppresses SKN-1.** (A-B) The heat stress inhibited the expression of *gst-4p::GFP* in wild type (A) but not in the *skn-1 gof* mutant worms (B). (C) The nuclear occupancy of SKN-1::GFP in germline loss *glp-1* mutants in response to heat stress. Left panel: representative images; right panel: quantification data. Arrow indicates nuclear GFP. The nuclear occupancy of SKN-1::GFP were scored as low (L), medium (M) and high (H). (D) Effects of *daf-16* mutation on the expression of *gst-4p::GFP* in response to heat stress. \*\*\*  $P < 0.001$ . Scale bar = 100 $\mu$ m for A, B, D. Scale bar = 20 $\mu$ m for C.
