# Supplementary material
Source: publisher figshare collection journal article supplement (https://gsajournals.figshare.com/articles/dataset/_/11919495)
Supplement: Supplementary file 6 [file 1]

**Table S2. The Ct values of qPCR.**

|          |                       |                         |                     |                         |
|----------|-----------------------|-------------------------|---------------------|-------------------------|
|          | <b><i>ges-1</i></b>   |                         | <b><i>snb-1</i></b> |                         |
|          | <b>WT</b>             | <b><i>skn-1</i> gof</b> | <b>WT</b>           | <b><i>skn-1</i> gof</b> |
| Repeat 1 | 24.82                 | 24.49                   | 22.18               | 21.63                   |
| Repeat 2 | 24.18                 | 24.62                   | 20.70               | 20.20                   |
| Repeat 3 | 20.59                 | 21.99                   | 18.47               | 18.20                   |
| Repeat 4 | 21.54                 | 22.67                   | 20.87               | 21.56                   |
|          | <b><i>asns-2</i></b>  |                         | <b><i>snb-1</i></b> |                         |
|          | <b>WT</b>             | <b><i>skn-1</i> gof</b> | <b>WT</b>           | <b><i>skn-1</i> gof</b> |
| Repeat 1 | 25.83                 | 25.92                   | 22.18               | 21.63                   |
| Repeat 2 | 25.16                 | 25.30                   | 20.70               | 20.20                   |
| Repeat 3 | 23.92                 | 24.70                   | 20.44               | 19.41                   |
| Repeat 4 | 24.70                 | 30.43                   | 20.87               | 21.56                   |
|          | <b><i>F21F3.3</i></b> |                         | <b><i>snb-1</i></b> |                         |
|          | <b>WT</b>             | <b><i>skn-1</i> gof</b> | <b>WT</b>           | <b><i>skn-1</i> gof</b> |
| Repeat 1 | 25.65                 | 25.45                   | 22.18               | 21.63                   |
| Repeat 2 | 24.95                 | 26.19                   | 20.15               | 20.77                   |
| Repeat 3 | 25.24                 | 26.70                   | 20.87               | 21.56                   |
|          | <b><i>mtl-1</i></b>   |                         | <b><i>snb-1</i></b> |                         |
|          | <b>WT</b>             | <b><i>skn-1</i> gof</b> | <b>WT</b>           | <b><i>skn-1</i> gof</b> |
| Repeat 1 | 23.04                 | 23.63                   | 21.52               | 20.20                   |
| Repeat 2 | 27.26                 | 28.86                   | 20.70               | 20.20                   |
| Repeat 3 | 25.38                 | 25.85                   | 20.44               | 19.41                   |
|          | <b><i>sod-3</i></b>   |                         | <b><i>snb-1</i></b> |                         |
|          | <b>WT</b>             | <b><i>skn-1</i> gof</b> | <b>WT</b>           | <b><i>skn-1</i> gof</b> |
| Repeat 1 | 24.62                 | 25.12                   | 21.52               | 20.20                   |
| Repeat 2 | 24.95                 | 25.71                   | 20.70               | 20.20                   |
|          | <b><i>daf-16</i></b>  |                         | <b><i>snb-1</i></b> |                         |
|          | <b>WT</b>             | <b><i>skn-1</i> gof</b> | <b>WT</b>           | <b><i>skn-1</i> gof</b> |
| Repeat 1 | 24.09                 | 24.08                   | 22.37               | 22.08                   |
| Repeat 2 | 24.32                 | 24.17                   | 22.29               | 22.11                   |
| Repeat 3 | 24.46                 | 23.96                   | 23.05               | 22.61                   |
